# Supplementary material
Source: PubMed Central journal article supplement (PMC9077079)
Supplement: ajcr0012-1899-f4.pdf [file ajcr0012-1899-f4.pdf]

CAR classification determined prognosis of unresectable HCC patients

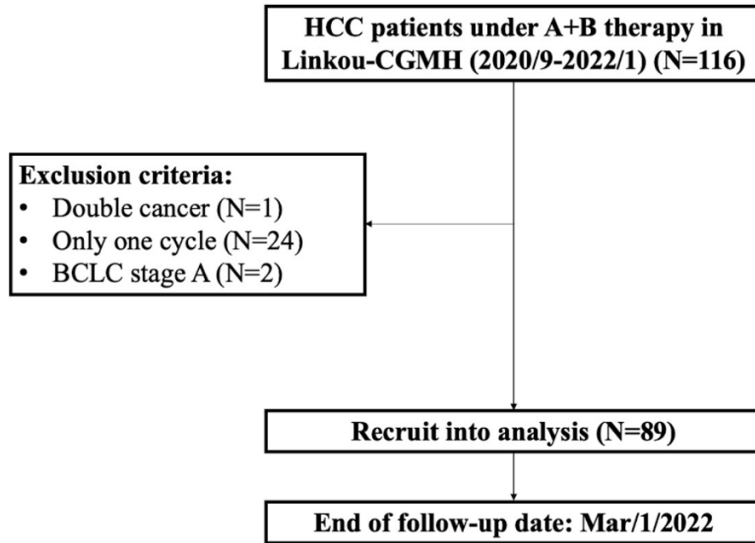

Supplementary Figure 1. Flowchart of patient recruitment.

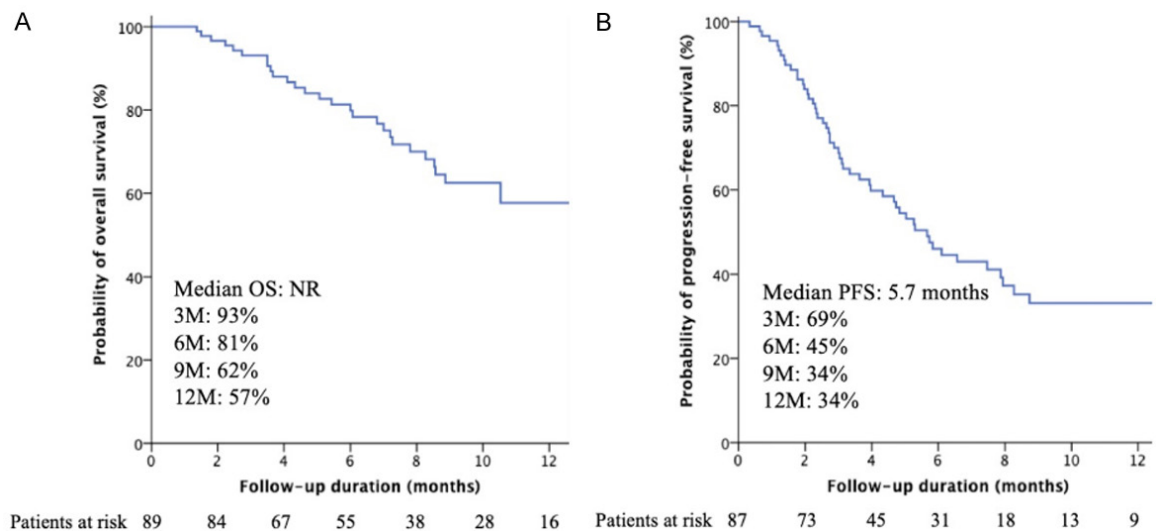

Supplementary Figure 2. Kaplan-Meier curves of overall patients. (A) Overall survival (OS) (B) progression-free survival (PFS).

## CAR classification determined prognosis of unresectable HCC patients

**Supplementary Table 1.** Accuracy for prediction of OS, PFS and tumor response

|                         | OS    | PFS   | Tumor response |
|-------------------------|-------|-------|----------------|
| <b>Sensitivity</b>      |       |       |                |
| CRAFITY score           | 71.4% | 50.0% | 72.7%          |
| AFP response at 6 weeks | 53.8% | 50.0% | 90.5%          |
| CAR classification      | 76.7% | 71.0% | 100%           |
| <b>Specificity</b>      |       |       |                |
| CRAFITY score           | 69.2% | 71.4% | 43.6%          |
| AFP response at 6 weeks | 66.7% | 75.0% | 48.4%          |
| CAR classification      | 89.5% | 95.2% | 62.5%          |
| <b>PPV</b>              |       |       |                |
| CRAFITY score           | 45.5% | 71.4% | 26.7%          |
| AFP response at 6 weeks | 41.2% | 72.7% | 37.3%          |
| CAR classification      | 63.6% | 90.0% | 36.2%          |
| <b>NPV</b>              |       |       |                |
| CRAFITY score           | 87.1% | 50.0% | 85.0%          |
| AFP response at 6 weeks | 76.9% | 52.9% | 93.8%          |
| CAR classification      | 81.0% | 57.6% | 100%           |

Abbreviations: AFP, Alpha-fetoprotein; CAR, CRAFITY score and AFP-Response; CRAFITY, CRP and AFP in Immunotherapy; NPV, negative predictive value; PPV, positive predictive value.

**Supplementary Table 2.** Treatment-related adverse events due to Atezolizumab and bevacizumab

| Adverse events                       | Any grade | Grade $\geq 3$ |
|--------------------------------------|-----------|----------------|
| Any adverse event                    | 54 (61)   | 9 (10)         |
| Hypertension                         | 19 (21)   | 2 (2)          |
| Aspartate aminotransferase increased | 17 (19)   | 1 (1)          |
| Alanine aminotransferase increased   | 15 (17)   | 2 (2)          |
| Fatigue                              | 12 (13)   | 0 (0)          |
| Anorexia or nausea                   | 11 (12)   | 1 (1)          |
| Proteinuria                          | 9 (10)    | 0 (0)          |
| Dermatitis                           | 8 (9)     | 1 (1)          |
| Pyrexia                              | 8 (9)     | 1 (1)          |
| Diarrhea                             | 7 (8)     | 0 (0)          |
| Upper gastrointestinal bleeding      | 4 (4)     | 4 (4)          |
| Muscle soreness                      | 3 (3)     | 1 (1)          |
| Hypothyroidism                       | 3 (3)     | 0 (0)          |
| Hoarseness                           | 3 (3)     | 0 (0)          |
| Platelet decrease                    | 3 (3)     | 0 (0)          |
| Blood bilirubin increased            | 2 (2)     | 0 (0)          |
| Hyperthyroidism                      | 2 (2)     | 0 (0)          |
| Headache                             | 2 (2)     | 0 (0)          |
| Chills                               | 2 (2)     | 0 (0)          |
| Dizziness                            | 2 (2)     | 0 (0)          |
| Cough                                | 2 (2)     | 0 (0)          |
| Epistaxis                            | 2 (2)     | 0 (0)          |
| Oral ulcer                           | 1 (1)     | 0 (0)          |
| Infusion reaction                    | 1 (1)     | 0 (0)          |
| Alkaline phosphatase increase        | 1 (1)     | 0 (0)          |
